# Supplementary material
Source: PubMed Central journal article supplement (PMC4821809)
Supplement: NIHMS773291-supplement-Suppl_Figueres.pdf [file NIHMS773291-supplement-Suppl_Figueres.pdf]

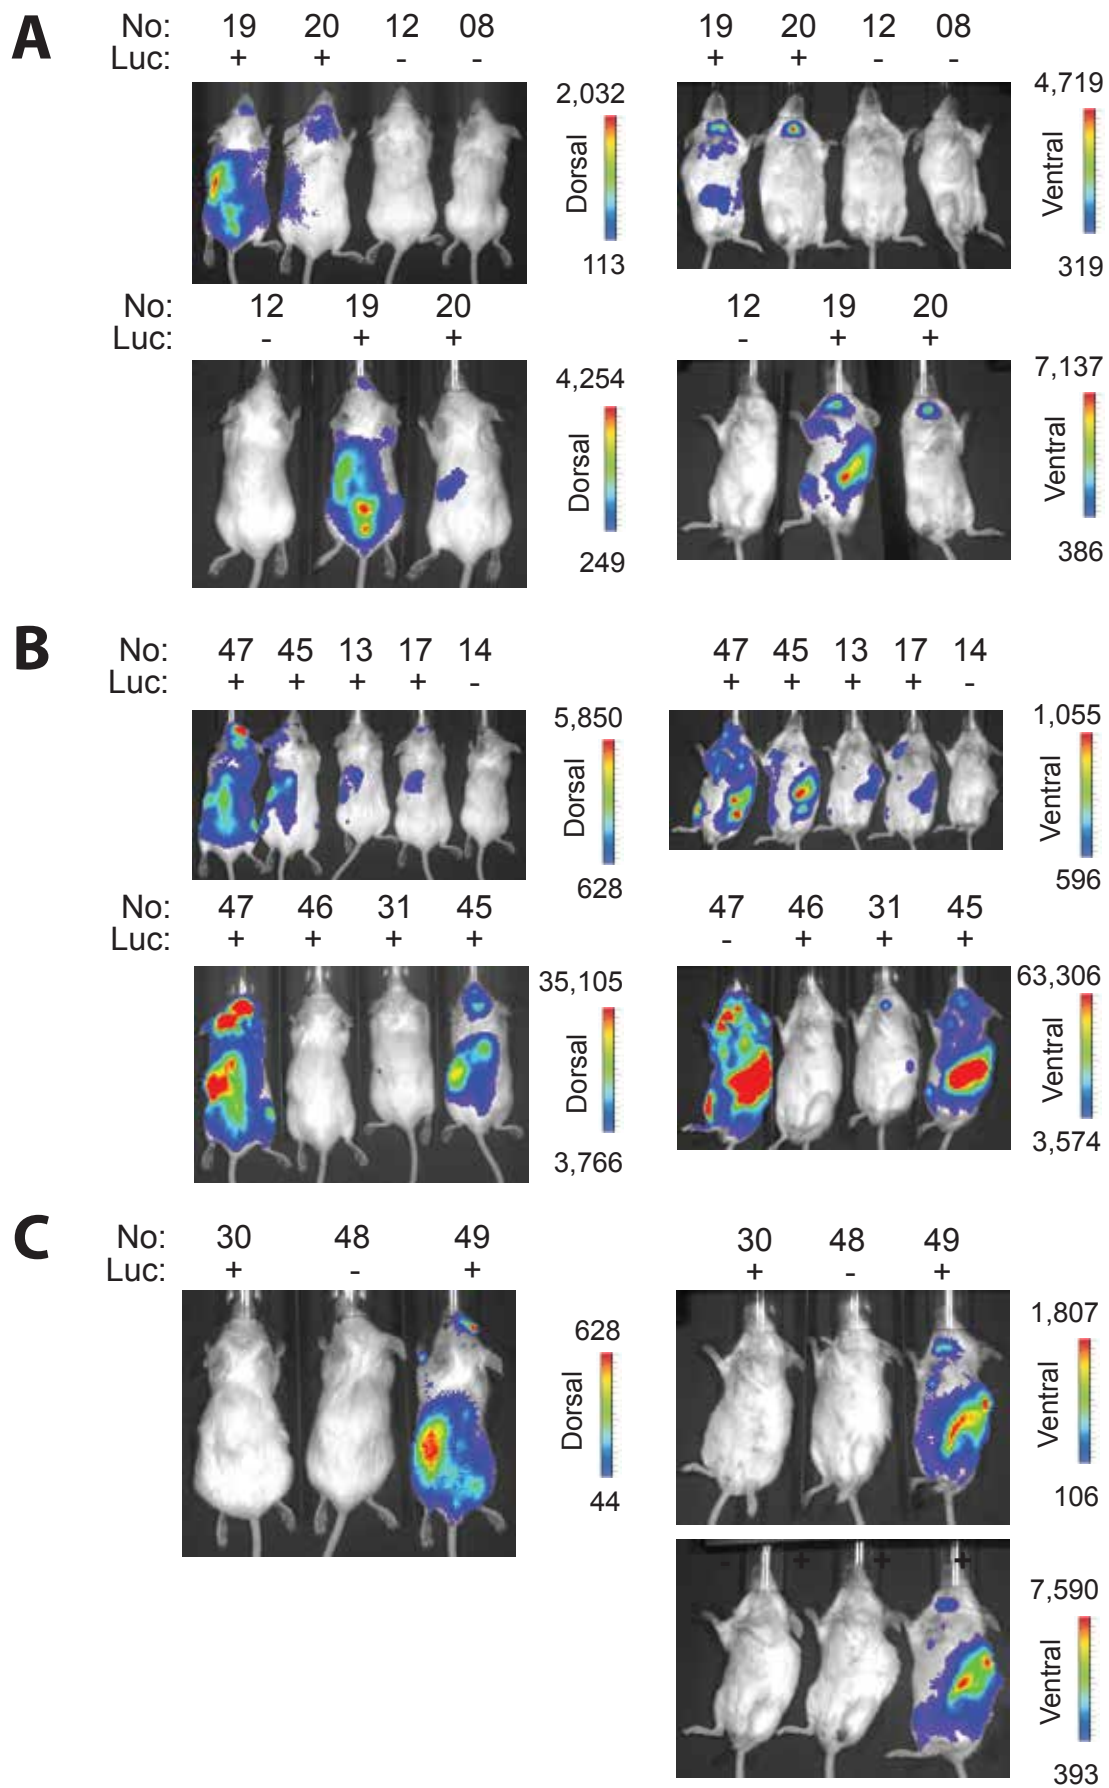

Supplemental Figure 1: Tompkins *et al.*

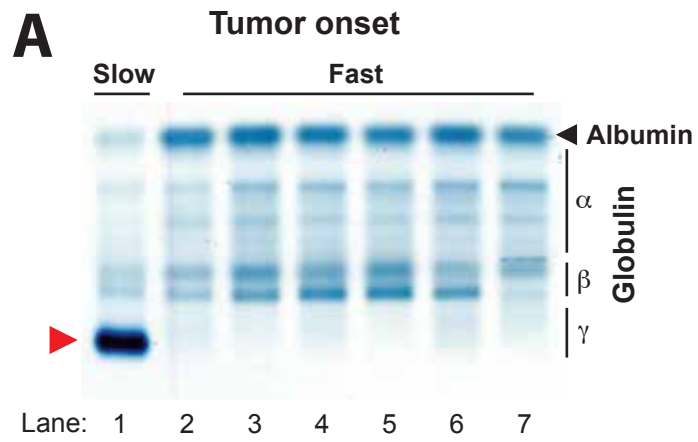

**B** Bone marrow (H&E, 100x)

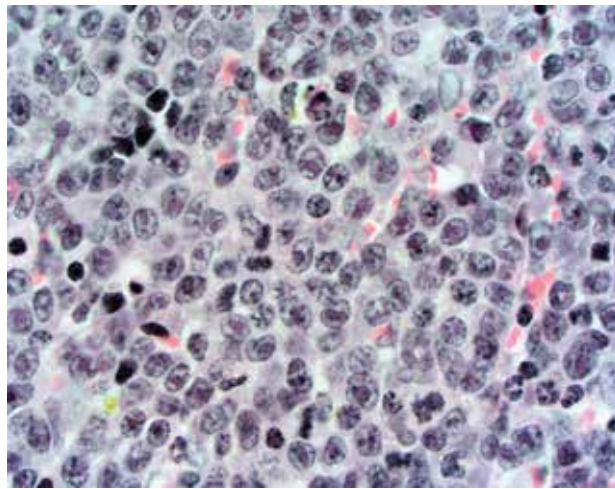

Fast-onset DLBCL

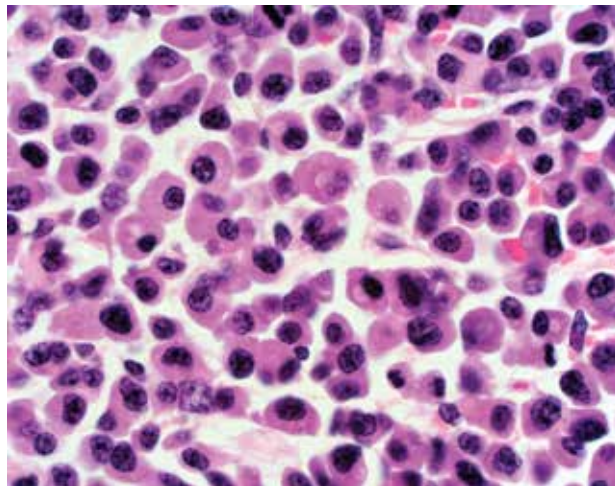

Slow-onset PCN

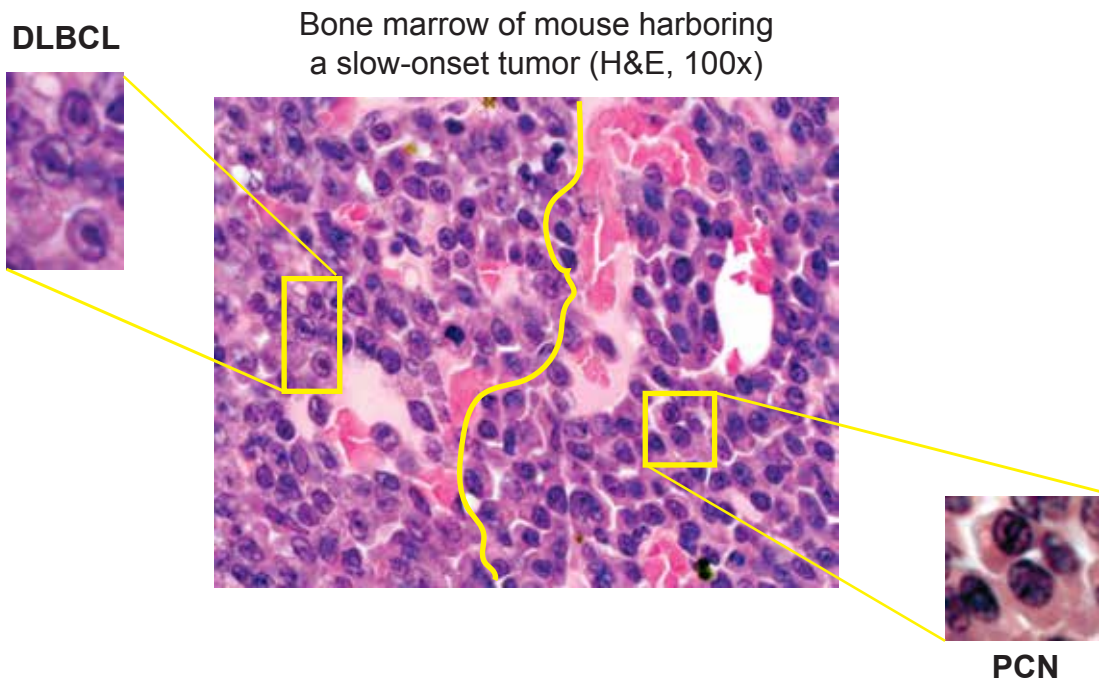

**Supplemental Figure 3: Tompkins *et al.***

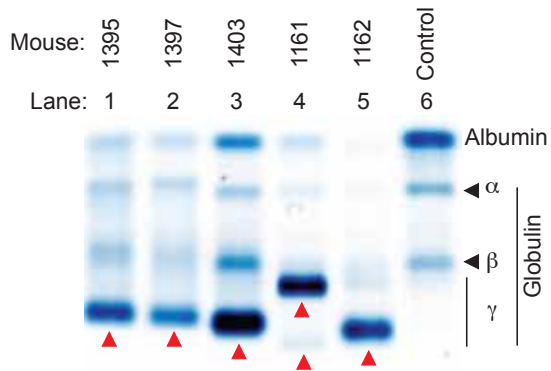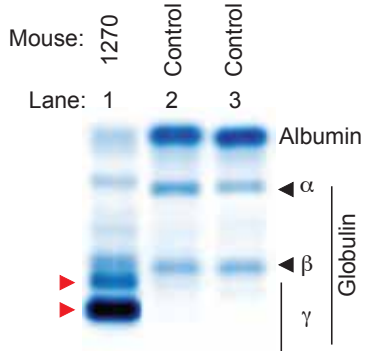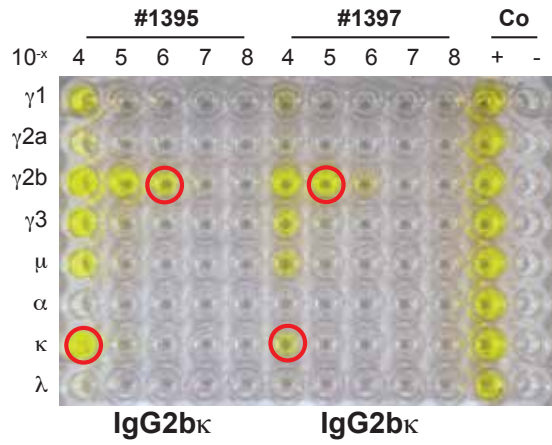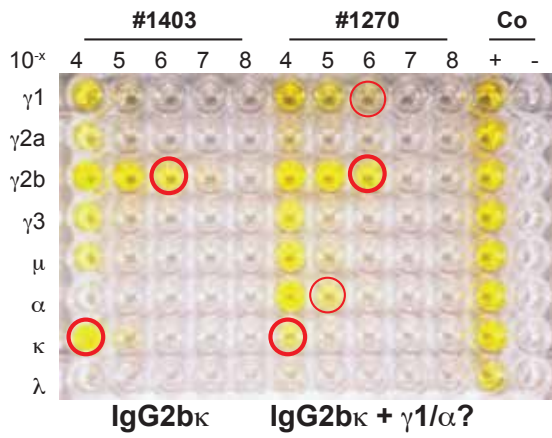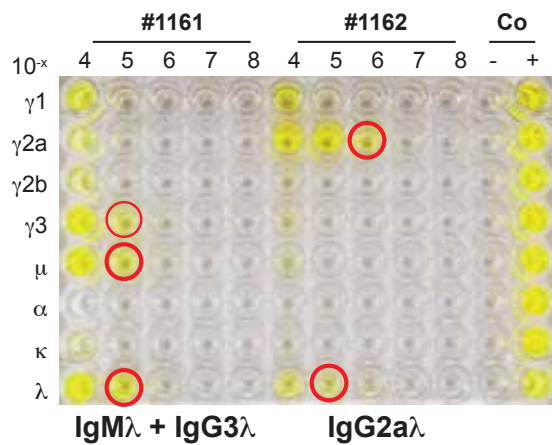

Supplemental Figure 4: Tompkins *et al.*



# Cast nephropathy

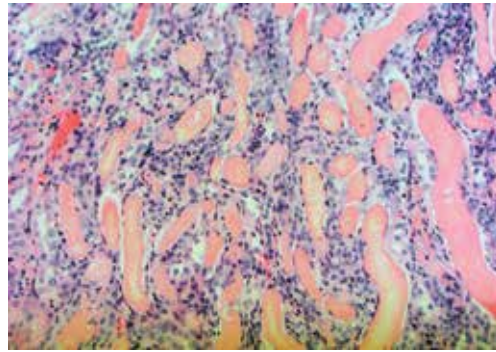

Acute inflammation

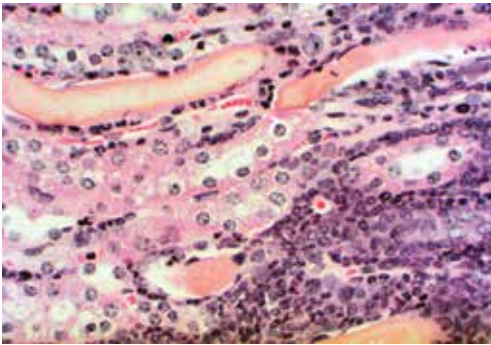

Chronic inflammation

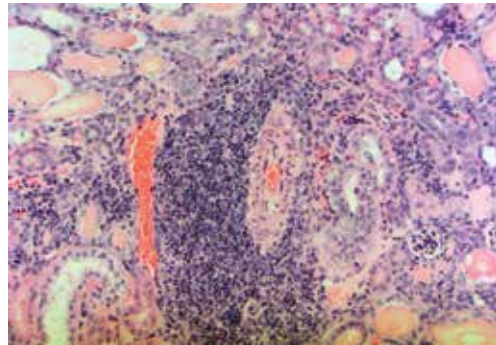

Neoplastic plasma cells

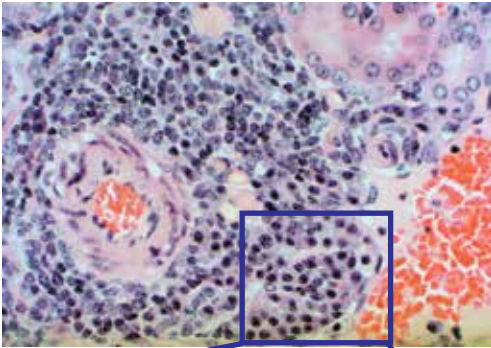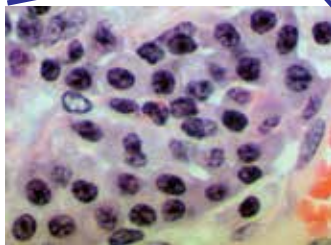

Giant cell

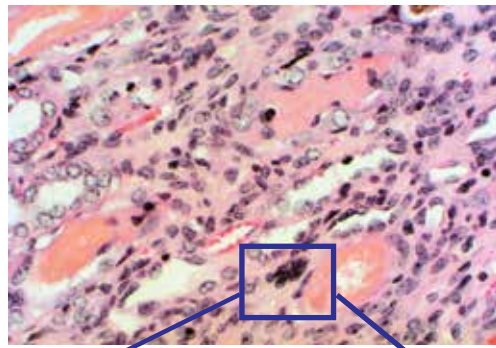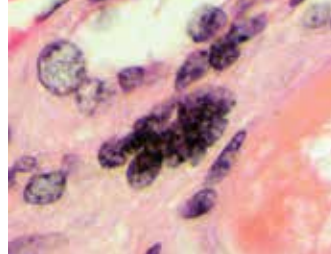

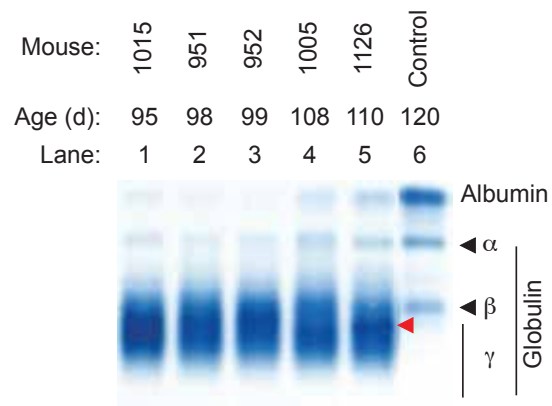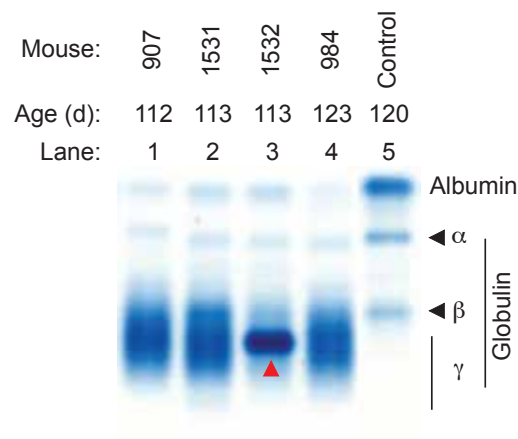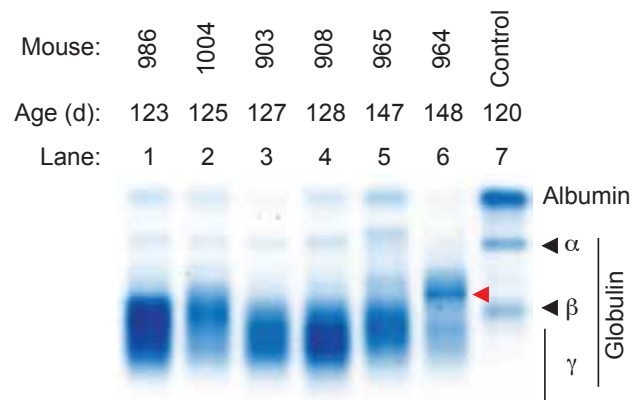

Supplemental Figure 6: Tompkins *et al.*

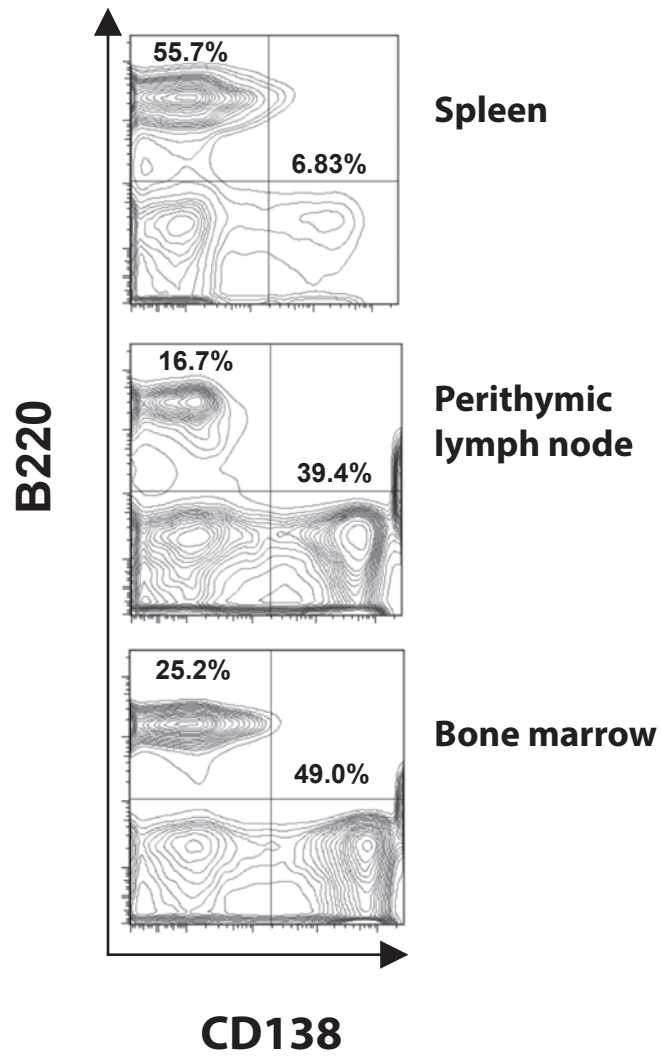

Supplemental Figure 7: Tompkins *et al.*

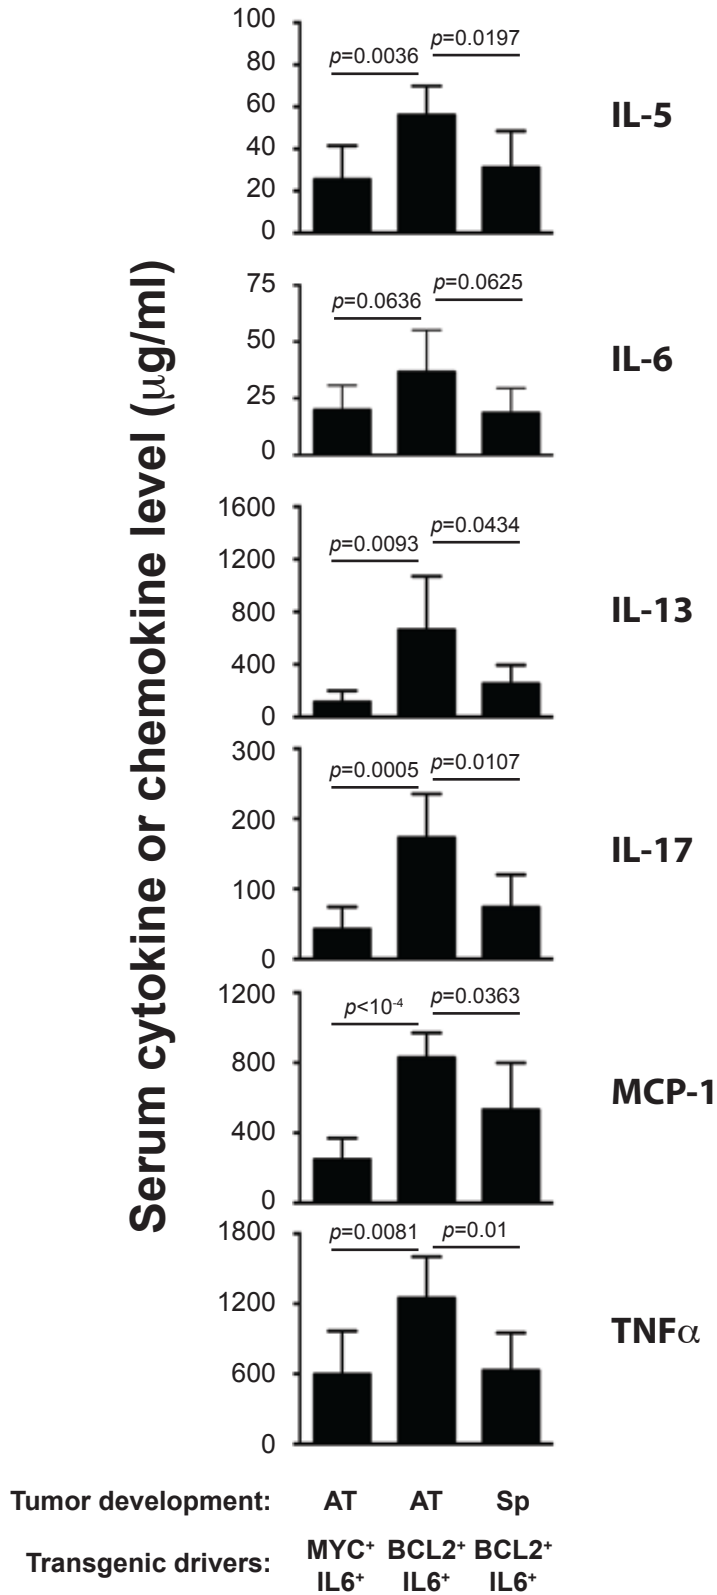

Supplemental Figure 8: Tompkins *et al.*



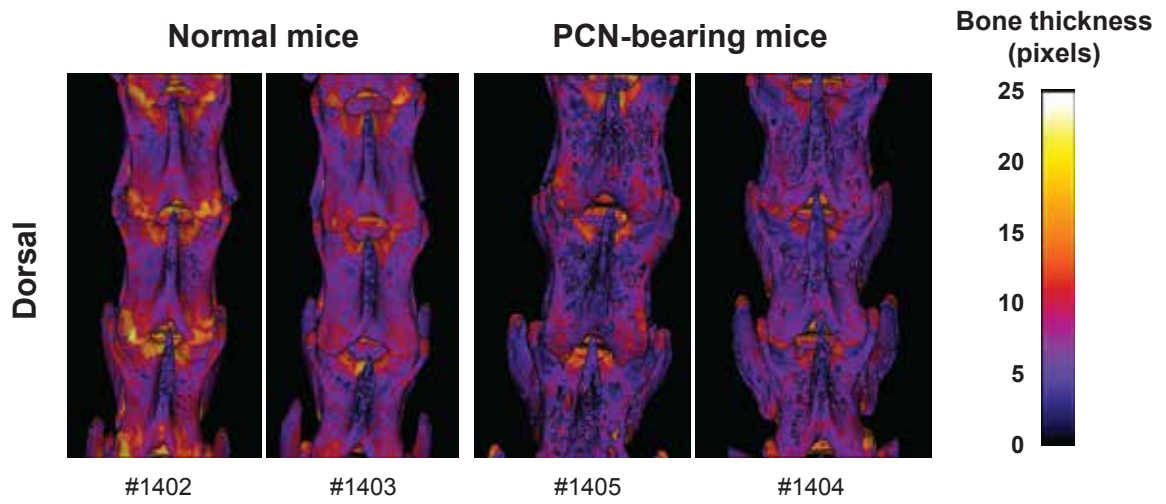

Supplemental Figure 9: Tompkins *et al.*
